1 **Prognostic value of plasma IgG N-glycome traits in patients with pulmonary**  
2 **arterial hypertension: an observational cohort study**

3 **Running title:** *Plasma prognostic glycan biomarker for PAH*

4 Ze-Jian Zhang, PhD<sup>1#</sup>; Chao Liu, MD<sup>2#</sup>; Jie-Ling Ma, MD<sup>2#</sup>; Jing-Si Ma, BS<sup>3</sup>; Jia  
5 Wang, BS<sup>4</sup>; Ruo-Nan Li, BS<sup>3</sup>; Dan Lu, MD<sup>5</sup>; Yu-Ping Zhou, MD<sup>2</sup>; Tian-Yu Lian,  
6 MD<sup>1</sup>; Si-Jin Zhang, MD<sup>6</sup>; Jing-Hui Li, MD<sup>7</sup>; Lan Wang, MD<sup>8</sup>; Kai Sun, MD<sup>1</sup>; Chun-  
7 Yan Cheng, MD<sup>6\*</sup>; Wen-Hui Wu<sup>8\*</sup>; and Zhi-Cheng Jing, MD<sup>6\*</sup>

8 **Affiliations**

9 <sup>1</sup>State Key Laboratory of Complex Severe and Rare Diseases, Peking Union Medical  
10 College Hospital, Chinese Academy of Medical Sciences and Peking Union Medical  
11 College, Beijing 100730, China;

12 <sup>2</sup>Department of Cardiology, State Key Laboratory of Complex Severe and Rare  
13 Diseases, Peking Union Medical College Hospital, Chinese Academy of Medical  
14 Sciences and Peking Union Medical College, Beijing 100730, China;

15 <sup>3</sup>School of Pharmacy, Henan University, Kaifeng 475004, China;

16 <sup>4</sup>Department of Medical Laboratory, Weifang Medical University, Weifang 261053  
17 China;

18 <sup>5</sup>Cardiac Department, Aerospace Center Hospital, Peking University Aerospace School  
19 of Clinical Medicine, Beijing 100049, China;

20 <sup>6</sup>Department of Cardiology, Guangdong Institute of Cardiovascular Diseases,  
21 Guangdong Provincial People's Hospital, Guangdong Academy of Medical Sciences,  
22 Southern Medical University, Guangzhou 510080, China;

**NOTE: This preprint reports new research that has not been certified by peer review and should not be used to guide clinical practice.**

23 <sup>7</sup>State Key Laboratory of Cardiovascular Disease and FuWai Hospital, Chinese  
24 Academy of Medical Sciences and Peking Union Medical College, Beijing 100037,  
25 China;

26 <sup>8</sup>Department of Cardio-Pulmonary Circulation, Shanghai Pulmonary Hospital, School  
27 of Medicine, Tongji University, Shanghai 200433, China.

28 <sup>#</sup>These authors contributed equally to this work as co-first authors.

29 <sup>\*</sup>These authors contributed equally to this study as co-corresponding authors.

30 **Address for Correspondence:**

31 Zhi-Cheng Jing, MD, PhD

32 Department of Cardiology, Guangdong Institute of Cardiovascular Diseases,  
33 Guangdong Provincial People's Hospital, Guangdong Academy of Medical Sciences,  
34 Southern Medical University, No.106, Zhongshan 2nd Road, Guangzhou 510080,  
35 China.

36 Tel: +86-13501353191

37 E-mail: [jingzhicheng@vip.163.com](mailto:jingzhicheng@vip.163.com)

38 Wen-Hui Wu, MD

39 Department of Cardio-Pulmonary Circulation, Shanghai Pulmonary Hospital, School  
40 of Medicine, Tongji University, Shanghai 200433, China, No.507, Zhengmin Road,  
41 Shanghai 200433, China.

42 Tel: +86-13917180587

43 E-mail: [wenhui5621006@126.com](mailto:wenhui5621006@126.com)

44 Chun-Yan Cheng, MD

45 Department of Cardiology, Guangdong Institute of Cardiovascular Diseases,  
46 Guangdong Provincial People's Hospital, Guangdong Academy of Medical Sciences,  
47 Southern Medical University, No.106, Zhongshan 2nd Road, Guangzhou 510080,  
48 China.

49 Tel: +86-20-83827812

50 E-mail: 073047chengchunyan@163.com

51 **Word Count for main text: 3773**

52 **Abstract**

53 **Background:** BNP (brain natriuretic peptide) or NT-proBNP (N-terminal proBNP) is  
54 the only blood biomarker in the established risk calculators for pulmonary arterial  
55 hypertension (PAH). New plasma biomarkers of systemic origin may improve the risk  
56 assessment in PAH.

57 **Methods:** We utilized a robust mass spectrometry-based method to identify  
58 prognostic plasma IgG N-glycome traits in PAH patients from two national referral  
59 centers in China (Beijing [discovery] cohort,  $n = 273$ ; Shanghai cohort [validation],  $n$   
60  $= 349$ ). Then the candidate IgG N-glycan traits were evaluated in combined cohorts  
61 adjusted for potential confounders and subgroup analyses. At last, the candidate IgG  
62 N-glycan traits were further evaluated against the established prognostic risk equation  
63 (three-strata model from the SPAHR and COMPERA analyses) for PAH. The primary  
64 endpoint was all-cause mortality.

65 **Results:** IgG Fucosylation was found to predict survival independent of age and sex  
66 in the discovery cohort (HR: 0.377, 95% CI: 0.168-0.845,  $P = 0.018$ ) with  
67 confirmation in the validation cohort (HR: 0.264, 95% CI: 0.445-0.751,  $P = 0.005$ ).  
68 IgG Fucosylation remained a robust predictor of mortality in PAH patients in the  
69 combined cohorts adjusting for potential confounders and in subgroup analyses based  
70 on sex and treatment strategies. Moreover, the addition of the IgG Fucosylation to the  
71 established three-strata model significantly improved the predictive accuracy from  
72 AUC of 0.67 to AUC of 0.70 ( $P = 0.043$ ) and IgG Fucosylation was useful in further  
73 stratifying the intermediate risk PAH patients classified by the three-strata model into

74 intermediate-low and intermediate-high risk subgroups.

75 **Conclusions:** The plasma IgG Fucosylation informs prognosis independent of the

76 existing clinical assessments in PAH and may be useful in the clinical management of

77 patients with PAH.

78

79 **Keywords:** IgG N-glycans, pulmonary arterial hypertension, biomarker, prognosis,

80 risk stratification, fucosylation

81 **Non-standard Abbreviations and Acronyms**

82 6MWD: 6-minute walking distance

83 AUC: area under the curve

84 NT-proBNP: N-terminal pro-B-type natriuretic peptide

85 PAH: pulmonary arterial hypertension

86 PVR: pulmonary vascular resistance

87 RAP: right arterial pressure

88 ROC: receiver-operating characteristic

89 SvO<sub>2</sub>: mixed venous oxygen saturation

90 WHO FC: World Health Organization functional class

91

92 **Clinical Perspective**

93 **What is new?**

- 94 • The plasma IgG Fucosylation, which is in different pathophysiological pathways  
95 from other established risk factors of pulmonary arterial hypertension (PAH), can  
96 inform prognosis independent of the existing clinical assessments in patients with  
97 PAH.
- 98 • The addition of the IgG Fucosylation to the established three-strata model for PAH  
99 prognosis significantly improved the predictive accuracy.
- 100 • IgG Fucosylation was useful in further stratifying the intermediate risk PAH  
101 patients classified by the three-strata model into intermediate-high and  
102 intermediate-low risk subgroups.

103 **What are the clinical implications?**

- 104 • Plasma IgG N-glycan biomarkers may provide a refined risk stratification in PAH  
105 used in combination with the established risk factors.
- 106 • IgG Fucosylation involved in inflammatory pathways may not only be a promising  
107 prognostic biomarker but also a potential novel therapeutic target, distinct from  
108 existing targets, for patients with PAH.

109

## 110 **Introduction**

111 Pulmonary arterial hypertension (PAH) represents a rare and malignant  
112 cardiopulmonary condition characterized by dysregulation of endothelium-derived  
113 vasoactive factors, inflammatory processes, and obstructive remodeling of small  
114 pulmonary arteries. These pathological changes lead to a progressive increase in  
115 pulmonary vascular resistance (PVR) and mean pulmonary artery pressure,  
116 culminating in right heart failure and, ultimately, death for the majority of affected  
117 patients.<sup>1,2</sup>

118

119 The prognosis of PAH remains poor with an estimated 5-year survival rate of 60% for  
120 patients with advanced PAH.<sup>3-5</sup> Nevertheless, treatment response varies between  
121 patients due to the heterogeneity of the disease,<sup>6</sup> and life expectancy is quite variable.

122 Risk stratification and regular assessment of disease severity are vital to guide the  
123 clinical management of patients with PAH.<sup>1,2</sup> The existing guidelines recommend  
124 multiparametric risk calculators based on clinical assessment, right ventricular  
125 function, exercise, and hemodynamic variables to inform prognosis and guide  
126 treatment decision-making in PAH.<sup>1,2</sup> However, the multidimensional approach  
127 suffers from some disadvantages and limitations, such as not all these measurements  
128 available at each patient visit, some factors obtained invasively, unsatisfied accuracy,  
129 and restricted mechanisms reflected by the parameters. Moreover, in the established  
130 multifactorial prognostic model, the circulating biomarker includes only BNP (brain  
131 natriuretic peptide) or NT-proBNP (N-terminal proBNP). Abnormal immune



132 regulation and inflammation have been recognized as critical contributors to the  
133 pathogenesis of PAH.<sup>7-9</sup> New plasma biomarkers of systemic origin reflecting  
134 different components of the pathophysiology of PAH such as immune dysregulation  
135 and inflammation may improve the risk assessment of PAH and provide a more  
136 sensitive measure of disease severity and therapeutic response.

137

138 Glycosylation is a prevalent and important post-translational modification that  
139 modulates a variety of biological functions.<sup>10,11</sup> Abnormal glycosylation of proteins is  
140 thought to play a role in almost every major disease.<sup>12,13</sup> IgG, the predominant  
141 glycoprotein and antibody in human biofluids, is a key effector of the humoral  
142 immune system and has multiple roles in maintaining the balance of inflammation at  
143 the systemic level.<sup>14</sup> The conserved N-linked glycans bound to the unique  
144 glycosylation site Asn297 in the Fc domain of IgG are of the complex biantennary  
145 type.<sup>15,16</sup> The N-glycan compositions on IgG, particularly the core fucose moiety and  
146 the terminal galactose or sialic acids, exhibit variability and hold pivotal roles in  
147 regulating IgG structural stability and functional activity, which influences the  
148 outcome of the immune response (e.g., antibody's effector functions).<sup>17</sup> For example,  
149 it has been widely acknowledged that decreased levels of IgG core fucose contribute  
150 to increased antibody-dependent cellular cytotoxicity (ADCC) and inflammation.<sup>18-21</sup>  
151 IgG loss of terminal galactose could trigger a proinflammatory response.<sup>22,23</sup> It is  
152 noteworthy that our team has previously demonstrated dysregulation of the plasma  
153 IgG N-glycome in patients with chronic thromboembolic pulmonary hypertension<sup>24</sup>

154 and the identified abnormal IgG N-glycan traits may play a crucial role in the  
155 pathogenesis and progression of this condition.<sup>24</sup> Nevertheless, the glycosylation  
156 characteristics of IgG and their prognostic value in patients with PAH have not yet  
157 been explored.

158

159 The main objective of this study was to identify and validate plasma IgG N-glycan  
160 traits that predict survival in patients with PAH to improve risk stratification.

161

## 162 **Methods**

### 163 **Study population**

164 From October 2006 to December 2019, all consecutive patients with a definite  
165 diagnosis of idiopathic PAH or heritable PAH at two national pulmonary hypertension  
166 referral centres (Shanghai Pulmonary Hospital with patients mainly from South China  
167 and FuWai Hospital in Beijing with patients mainly from North China) were included  
168 in this study. Idiopathic PAH was diagnosed based on baseline right heart  
169 catheterization confirming newly diagnosed precapillary pulmonary hypertension,  
170 defined by a resting mean pulmonary artery pressure $\geq$ 25 mmHg, pulmonary artery  
171 wedge pressure $\leq$ 15 mmHg, and PVR $>$ 3 Wood units, in the absence of other known  
172 causes of PAH.<sup>1,2</sup> Patients with PAH were diagnosed with heritable PAH if their first or  
173 second-degree relatives had a confirmed PAH diagnosis or died from a PAH-like  
174 syndrome.<sup>1,2</sup> The ethics review boards of Shanghai Pulmonary Hospital and FuWai  
175 Hospital approved the protocols. Written informed consent was obtained from all

176 patients. This study complied with the principles of the Declaration of Helsinki.

177

### 178 **Baseline blood samples, data collection, and follow-up**

179 Baseline demographic and clinical characteristics, including World Health  
180 Organization functional class (WHO FC), 6-minute walking distance (6MWD), and  
181 invasive haemodynamics including right arterial pressure (RAP), mean pulmonary  
182 artery pressure, pulmonary artery wedge pressure, cardiac index, PVR, and mixed  
183 venous oxygen saturation (SvO<sub>2</sub>) were collected. Baseline venous plasma for IgG N-  
184 glycome profiling and haemodynamic data were obtained during the first diagnostic  
185 right heart catheterization. Follow-ups were carried out through clinic visits or phone  
186 or internet interviews, and the patient's survival time was calculated by months from  
187 the initial PAH diagnosis date to January 2023 or the latest contact date. The primary  
188 clinical endpoint was all-cause mortality.

189

### 190 **Mass spectrometric IgG N-glycome profiling**

191 The profiling of IgG N-glycome was carried out using matrix-assisted laser  
192 desorption/ionization time-of-flight mass spectrometry,<sup>25-27</sup> with raw mass  
193 spectrometry data processing performed according to established methods outlined in  
194 previous reports.<sup>25-27</sup> Detailed procedures are provided in the Supplementary Material  
195 for reference.

196

197 To combine the effects of individual detected N-glycan traits sharing similar

198 structures and better interpret the biological effects of IgG N-glycosylation,<sup>28,29</sup>  
199 derived (calculated) N-glycan traits representing the most important features of IgG  
200 N-glycosylation including Galactosylation, Bisecting N-acetylglucosamine, and  
201 Fucosylation were calculated from the directly detected N-glycans. The formulas used  
202 for the calculation: Galactosylation =  $H3N4F1 / (H4N4F1 + 2 * H5N4F1)$ ; Bisecting N-  
203 acetylglucosamine =  $H3N5F1 + H4N5F1 + H5N5F1$ ; Fucosylation =  $H3N4F1 +$   
204  $H4N4F1 + H3N5F1 + H5N4F1 + H4N5F1 + H5N5F1$  (H = hexose; N = N-  
205 acetylhexosamine; F = deoxyhexose [fucose]).<sup>24,27</sup> GlycoWorkbench software  
206 (version 1.1.3480) was used to annotate the N-glycan structures.

207

## 208 **Statistical analysis**

209 Normality was determined using the Kolmogorov-Smirnov test. Continuous variables  
210 were presented as mean  $\pm$  SD for normally distributed data, and as median  
211 (interquartile range, 25% to 75%) for non-normally distributed variables. Categorical  
212 variables were presented as n (%). Statistical analysis was performed with Statistic  
213 Package for Social Science (SPSS Inc., Chicago, USA) version 22.0 and GraphPad  
214 Prism version 8.0.0 for Windows (GraphPad Software, San Diego, California USA,  
215 [www.graphpad.com](http://www.graphpad.com)). All tests were two-tailed with a value of  $P < 0.05$  considered  
216 statistically significant.

217

218 Prognostic IgG N-glycan traits were identified by Cox regression analysis corrected  
219 for age and sex in the discovery cohort and confirmed in the validation cohort. To

220 assess whether the prognostic IgG N-glycan trait screened out was an independent  
221 prognostic factor, Cox regression analysis adjusted for potential confounders  
222 including age, sex, type of PAH, treatment strategies, 6MWD, WHO FC, NT-proBNP,  
223 RAP, SvO<sub>2</sub>, and cardiac index were conducted. Further adjusted Cox regression  
224 analyses were conducted in subgroups stratified by sex and therapeutic strategies. To  
225 assess the added value of IgG N-glycan traits to the established risk model, we  
226 compared the prognostic accuracy of the three-strata model (the established  
227 prognostic risk equation derived from the SPAHR and the COMPERA registry)<sup>30,31</sup>  
228 with that of the IgG N-glycan + three-strata model using receiver-operating  
229 characteristic (ROC) analysis. Additionally, IgG N-glycans were employed to further  
230 stratify PAH patients classified as intermediate risk by the three-strata model, utilizing  
231 Kaplan-Meier survival analysis. The optimal cut-off values for the prognostic IgG N-  
232 glycan traits in Kaplan-Meier and Cox regression analyses were determined based on  
233 the values that maximized the sum of sensitivity and specificity in ROC analysis.<sup>32</sup>

234

## 235 **Results**

### 236 **Study population and baseline characteristics**

237 The study design is illustrated in Figure 1. A total of 273 patients with PAH enrolled  
238 from Fuwai Hospital between 2013 and 2019 (discovery cohort) and 349 patients with  
239 PAH enrolled from Shanghai Pulmonary Hospital between 2006 and 2013 (validation  
240 cohort) were included in this study.

241

242 Among the patients, 58 (21.2%) in the discovery cohort and 109 (31.2%) in the  
243 validation cohort were male. The mean ages were  $32.8 \pm 10.4$  and  $35.9 \pm 16.8$  years in  
244 the discovery and validation cohorts, respectively. In the discovery cohort, 11 (4.0%)  
245 patients received untargeted therapy, 80 (29.3%) patients received monotherapy, 148  
246 (54.2%) patients received dual therapy, and 34 (12.5%) patients received triple  
247 therapy. In the validation cohort, 66 (18.9%) patients received untargeted therapy, 227  
248 (65.0%) patients received monotherapy, 53 (15.2%) patients received dual therapy,  
249 and 3 (0.9%) patients received triple therapy (Table 1).

250

#### 251 **Follow-up**

252 During a median follow-up of 39 (22-63) months, 41 patients (6.6%, 2 in the  
253 discovery cohort and 39 in the validation cohort) were lost to follow-up. In total, 139  
254 patients ( $n = 52$  in the discovery cohort and  $n = 87$  in the validation cohort) died at the  
255 end of the follow-up periods.

256

#### 257 **Plasma IgG N-glycome profiles in patients with PAH**

258 Eight IgG N-glycans were directly detected in our cohorts by matrix-assisted laser  
259 desorption/ionization time of flight mass spectrometry. The representative annotated  
260 mass spectrometry spectra of the IgG N-glycome profiles from the survivor and non-  
261 survivor in our PAH cohorts are provided in Supplemental Figure S1, which  
262 demonstrates variations in peak patterns between the two groups. As derived N-glycan  
263 traits represent glycosylation changes shared by a group of structurally related N-

264 glycans and enable better interpretation of the biological effects of glycosylation than  
265 directly detected N-glycan traits, three derived N-glycan traits including  
266 Galactosylation, Bisecting N-acetylglucosamine, and Fucosylation were calculated  
267 from the eight directly detected IgG N-glycans. We mainly evaluated IgG derived N-  
268 glycan traits in the present study.

269

### 270 **Identification of prognostic IgG N-glycan traits in patients with PAH**

271 Discovery and validation cohorts were used to evaluate the associations of IgG N-  
272 glycan traits with the survival of patients. In the discovery cohort, Galactosylation  
273 (HR: 2.257, 95% CI: 1.274–4.001,  $P = 0.005$ ; Figure 2A) and Fucosylation (HR:  
274 0.377, 95% CI: 0.168–0.845,  $P = 0.018$ ; Figure 2A) were found to predict survival  
275 independent of age and sex. Bisecting N-acetylglucosamine had no prognostic value  
276 (HR: 0.617, 95% CI: 0.219–1.737,  $P = 0.361$ ; Figure 2A). We continued to validate  
277 our results in the validation cohort. However, only Fucosylation was confirmed to be  
278 associated with all-cause death independent of age and sex (HR: 0.264, 95% CI:  
279 0.445–0.751,  $P = 0.005$ ; Figure 2B) and the prognostic effect of Galactosylation was  
280 not replicated (HR: 1.092, 95% CI: 0.694–1.717,  $P = 0.705$ ; Figure 2B). The  
281 Bisecting N-acetylglucosamine remained of no prognostic value in the validation  
282 cohort (HR: 1.789, 95% CI: 0.554–5.776,  $P = 0.330$ ; Figure 2B). Finally, IgG  
283 Fucosylation was identified as a promising candidate prognostic glycan biomarker,  
284 which was further validated below.

285

## 286 **The validation of the prognostic value of IgG Fucosylation**

287 We further evaluated the prognostic significance of IgG Fucosylation in the combined  
288 cohorts. In total, death occurred in 13.1% (25 out of 191) and 29.2% (114 out of 390)  
289 of patients in the high and low IgG Fucosylation groups, respectively, resulting in  
290 respective 5-year survival rates of 88.5% and 74.6% ( $P < 0.001$  for the log-rank test;  
291 Figure 3).

292

293 To evaluate whether IgG Fucosylation independently impacts the outcome of patients  
294 with PAH, Cox regression models were further adjusted for potential confounders  
295 including 6MWD, WHO FC, NT-proBNP, RAP, SvO<sub>2</sub>, cardiac index, type of PAH,  
296 and treatment strategies in addition to age and sex. Our results showed that the low  
297 IgG Fucosylation was still significantly associated with a high risk of all-cause death  
298 in patients with PAH (HR: 0.490; 95% CI: 0.315–0.763;  $P = 0.002$ ; Table 2; Figure 4).

299

300 Furthermore, in order to comprehensively demonstrate the prognostic value of IgG  
301 Fucosylation, we further conducted subgroup analyses based on sex and therapeutic  
302 strategies. Our results showed that even after stratifying by sex, the association  
303 between low IgG Fucosylation and increased all-cause mortality remained robust and  
304 there was no significant interaction between sex and IgG Fucosylation ( $P = 0.784$ ;  
305 Table 2); Interestingly, low Fucosylation posed a greater risk for males (fully adjusted  
306 models; male: HR: 0.387, 95% CI: 0.159–0.941,  $P = 0.035$  and female: HR: 0.527,  
307 95% CI: 0.307–0.906,  $P = 0.014$ ; Table 2; Figure 4). Furthermore, we did not observe



308 interactions between IgG Fucosylation and therapeutic strategies ( $P= 0.410$ ; Table 2).

309 We found that IgG Fucosylation continued to independently predict survival within

310 subgroups stratified based on therapeutic strategies (fully adjusted models; dual and

311 triple therapy: HR: 0.376, 95% CI: 0.148–0.954,  $P = 0.043$ ; treatment naïve and

312 monotherapy: HR: 0.595, 95% CI: 0.354–1,  $P = 0.033$ ; Table 2; Figure 4).

313

314 At last, we investigated whether the IgG Fucosylation offered improvements in risk

315 prediction in addition to the established prognostic risk equation (three-strata model

316 from the SPAHR and COMPERA analyses)<sup>30,31</sup> in PAH. We found the addition of IgG

317 Fucosylation to the three-strata model improved the prediction of outcomes from area

318 under the curve (AUC) 0.67 (95%CI: 0.62–0.72) to 0.70 (95%CI: 0.65–0.75) by ROC

319 analysis ( $P = 0.043$  for the difference in AUC) (Figure 5). In addition, about 60% of

320 patients in our cohort met intermediate risk criteria in the tree-strata model (Figure

321 6A) which was consistent with previous reports, and IgG Fucosylation was useful in

322 further dividing patients in the intermediate risk group into intermediate-high and

323 intermediate-low risk subgroups ( $P < 0.001$ , Figure 6B).

324

## 325 **Discussion**

326 Risk stratification has become an essential part of the management of patients with

327 PAH. The joint guidelines on pulmonary hypertension released in 2015 by the

328 European Society of Cardiology (ESC) and the European Respiratory Society (ERS)

329 introduced a multidimensional risk stratification model integrating 14 variables

330 obtained from nine distinct assessments. According to this model, the risk is  
331 categorized into three strata: low, intermediate, or high.<sup>1,2</sup> However, based on the  
332 three-strata model, the majority of patients with PAH were classified as intermediate  
333 risk.<sup>30,31</sup> Despite the development of refined or alternative methods, such as the  
334 prognostic risk equation from the French,<sup>33</sup> SPAHR,<sup>34</sup> REVEAL,<sup>35</sup> and COMPERA<sup>36</sup>  
335 Registries, challenges persist regarding the accuracy of stratification and the  
336 consistent availability of various clinical parameters during every patient visit. These  
337 limitations underscore the need for improvement in the approach to assessing the risk  
338 of PAH. In this context, several researchers have attempted to develop new protein  
339 biomarkers/panels from blood samples to improve risk assessment.<sup>37-39</sup> Although  
340 these studies have made significant contributions to exploring novel biomarkers for  
341 PAH, the latest 2022 ESC/ERS guidelines for PAH continued to recommend NT-  
342 proBNP as the exclusive blood biomarker.<sup>40</sup> Significantly, the studies of glycosylation  
343 of plasma proteins as potential biomarkers also shed new light on this field. The roles  
344 of plasma IgG N-glycosylation in cardiovascular diseases have been long investigated  
345 and discussed. The IgG glycosylation profile was found to be associated with  
346 cardiovascular disease risk score and subclinical atherosclerosis.<sup>41</sup> Additionally,  
347 alteration in plasma IgG N-glycosylation profiles was reported to be associated with  
348 blood pressure status, suggesting that IgG N-glycans may be potential postgenomic  
349 biomarkers for hypertension.<sup>42</sup> Notably, our recent discovery showcased the utility of  
350 IgG Gal-ratio, representing the distribution of IgG galactosylation, in evaluating the  
351 inflammatory state in patients with chronic thromboembolic pulmonary

352 hypertension.<sup>24</sup> These investigations underscored the immense promise of IgG N-  
353 glycans as biomarkers for the identification and prognostication of cardiovascular  
354 diseases. However, whether IgG N-glycans can be used as prognostic biomarkers for  
355 PAH remains to be explored.

356

357 To our knowledge, this is the first IgG N-glycomic study in PAH. Applying a robust  
358 method based on high-throughput mass spectrometry, we for the first time identified  
359 and validated that plasma IgG Fucosylation informs patients' survival independent of  
360 established risk factors. We first screened out the promising candidate prognostic  
361 marker IgG Fucosylation in the discovery cohort and validated it in another  
362 independent cohort. We then demonstrated that low plasma IgG Fucosylation was  
363 robustly associated with an increased risk of death in patients with PAH not only  
364 through overall analysis adjusted for potential confounders but also through subgroup  
365 analyses. At last, we found that the prognostic IgG Fucosylation improved the clinical  
366 risk prediction of the established prognostic risk equation (three-strata model from the  
367 SPAHR and COMPERA analyses).<sup>30,31</sup> This study adopted a rigorous validation  
368 scheme as used in other biomarker discovery studies, encompassing the stages of  
369 discovery (Beijing cohort), validation (Shanghai cohort), and random sampling  
370 analysis (combined cohorts). This comprehensive approach provided robust evidence  
371 supporting IgG Fucosylation as a significant prognostic factor in PAH, instilling  
372 confidence in the reliability of our findings.

373

374 Registries worldwide have consistently indicated a higher prevalence but better  
375 prognosis among female patients with PAH.<sup>43</sup> Interestingly, in the present study, we  
376 also observed sex-related differences and low IgG Fucosylation appeared to pose a  
377 higher risk in men compared to that in women. Furthermore, in our subgroup analysis  
378 based on therapeutic strategies, our results demonstrated that baseline IgG  
379 Fucosylation effectively distinguished low-risk and high-risk patients, not only within  
380 the treatment-naïve and monotherapy subgroup but also within the dual and triple  
381 therapy subgroup. Despite the substantial advancements in the modern era of PAH  
382 treatment, a specific subset of patients continues to face a bleak prognosis.  
383 Remarkably, baseline IgG Fucosylation could still discern this subset of patients with  
384 adverse outcomes in the context of dual and triple therapy. However, the previously  
385 established three-strata model was less effective in predicting outcomes in modern  
386 treatment settings compared to monotherapy or treatment-naïve subgroups (data not  
387 shown). One potential explanation is that the current treatments do not target  
388 inflammatory pathways associated with IgG Fucosylation. Although modern dual and  
389 triple therapies significantly improve patient survival compared to monotherapy or  
390 treatment naïve, this improvement is unrelated to systemic-originated IgG  
391 Fucosylation. Baseline IgG Fucosylation can still sensitively predict survival, even  
392 more so in the dual and triple therapy groups. These findings suggested IgG  
393 Fucosylation may not only be a promising prognostic biomarker but also emerge as a  
394 potential novel therapeutic target, distinct from existing targets, for patients with PAH.  
395

396 In the SPAHR and COMPERA analyses, the majority of patients with PAH were  
397 identified as intermediate risk (~60-70%)<sup>30,31</sup> and similar results were also obtained in  
398 our cohorts using the three-strata model they proposed. Identifying high-risk patients  
399 is particularly important in the risk assessment at diagnosis.<sup>44,45</sup> Discriminating the  
400 intermediate-high risk group from the intermediate risk group that makes up the  
401 majority of the patients may prompt physicians to initiate more aggressive initial  
402 treatment strategies which have far-reaching effects on patients' long-term survival.<sup>44</sup>  
403 Therefore, a more granular risk stratification is needed for the patients in the  
404 intermediate risk group, which is vitally important for therapeutic decisions. Several  
405 reports have shown that the use of additional variables improved risk prediction and  
406 some groups also proposed the four-strata risk model.<sup>36,46-48</sup> In the present study, the  
407 potential plasma biomarker IgG Fucosylation also achieved promising results with  
408 further discrimination within the intermediate risk group. Specifically, the IgG  
409 Fucosylation improved discrimination AUC from 0.67 (uninformative test) to 0.70  
410 (moderately accurate test) and reclassification of patients in the intermediate risk  
411 group into intermediate-high and intermediate-low risk of the three-strata model,  
412 suggesting IgG Fucosylation provided added values in the risk stratification of PAH in  
413 combination with the established clinical targets.

414

415 Several studies have shown that core fucose on IgG plays a role in the progression of  
416 malignant diseases.<sup>49,50</sup> Functional studies revealed that the lack of core fucose in IgG  
417 N-glycome greatly increased the proinflammatory capacity of IgG through increased

418 binding of IgG to Fc $\gamma$ RIII and enhanced ADCC.<sup>51,52</sup> Decreased levels of core  
419 Fucosylation of IgG N-glycome coincide with increased inflammation in  
420 individuals.<sup>20</sup> Moreover, in our previous study, we found human plasma IgG N-  
421 glycome profiles exhibited a proinflammatory phenotype in chronic thromboembolic  
422 pulmonary hypertension and IgG proinflammatory N-glycans may be useful for  
423 assessing the occurrence and prognosis of patients with chronic thromboembolic  
424 pulmonary hypertension.<sup>24</sup> In the present study, decreased levels of IgG Fucosylation  
425 were found associated with increased mortality of patients with PAH. Therefore, we  
426 speculate that inflammation could be a mediator of the prognostic effect of IgG  
427 Fucosylation in patients with PAH, but the potential role of changes in IgG  
428 Fucosylation in the development and progression of PAH deserves in-depth  
429 exploration in future studies.

430

431 Circulating BNP or NT-proBNP secreted by cardiac myocytes in response to  
432 increased ventricle wall strain<sup>53</sup> is the only blood biomarker in the established risk  
433 calculators. Besides cardiac-originated BNP or NT-proBNP, systemic-originated IgG  
434 Fucosylation which is associated with systemic immune and inflammation was found  
435 to provide independent values to inform risk stratification in this study. Therefore,  
436 plasma biomarkers from different pathways in the pathophysiology of PAH  
437 collectively provide more comprehensive information compared to parameters  
438 indicating limited mechanisms. On the other hand, though previous studies have  
439 reported some new plasma proteins/protein panels may be useful in the risk

440 stratification of PAH, IgG Fucosylation identified in the present study is the first  
441 glycomic candidate biomarker for PAH prognosis. Glycomic biomarkers have many  
442 advantages over other omic markers. Especially, clinical IgG N-glycosylation analysis  
443 does not rely as heavily on mild serum/plasma storage conditions and timely analysis  
444 (glycans are even stable at 50 °C for two weeks) as many other omics analyses.<sup>54</sup> It is  
445 worth mentioning that the high-throughput workflow for IgG N-glycome profiling  
446 applied in the present study has been widely used in various studies,<sup>24-27,55</sup> enabling  
447 the candidate glycan biomarker to be more convenient for further clinical application.

448

#### 449 **Strengths and limitations**

450 A major advantage of this study is that we, for the first time, reliably identified and  
451 validated a novel independent prognostic biomarker plasma IgG Fucosylation for  
452 PAH using plasma IgG N-glycomics based on relatively large and independent  
453 multicenter PAH cohorts with long-term follow-up. Another strength of our study was  
454 that the IgG glycan biomarker is systemic-originated and in different pathways of the  
455 pathophysiology of PAH from other established risk factors, which provided added  
456 values for the prognostication of patients with PAH. Nonetheless, our study has  
457 several limitations. First, only idiopathic and heritable PAH were included in our  
458 cohorts. The survival in patients with other types of PAH (caused by other associated  
459 conditions such as congenital heart disease, connective tissue diseases, and  
460 portopulmonary hypertension) may differ significantly from that of patients with  
461 idiopathic or heritable PAH. Therefore, applying the conclusions drawn from this

462 study to other categories of PAH requires extreme caution and the prognostic  
463 significance of IgG Fucosylation in other subtypes of PAH will be evaluated in future  
464 studies. Second, in the present study, we discovered that decreased levels of IgG  
465 Fucosylation were independently associated with an increased risk of death in patients  
466 with PAH. Though some functional studies have shown that the absence of core  
467 fucose in IgG N-glycome affects inflammatory signaling and immune response  
468 outcomes, the mechanisms underlying our findings and the potential role of altered  
469 IgG Fucosylation in the development and progression of PAH warrant in-depth  
470 investigation. Third, we evaluated the prognostic value of baseline plasma IgG N-  
471 glycome profiles in PAH. Future investigations should explore the clinical  
472 implications of IgG N-glycome variations in patients undergoing diverse stages of  
473 treatment. Last, though the sample size of our cohorts was relatively large, the  
474 numbers became small in the subgroups of sensitivity analyses and stratified analyses.  
475 The accuracy of IgG Fucosylation in prognostication would be increased with an  
476 increased number of samples.

477

## 478 **Conclusions**

479 Through a comprehensive scheme, we identified and validated a plasma glycomic  
480 prognostic biomarker, which is in different pathophysiological pathways from other  
481 established risk factors of PAH, to risk stratify patients with PAH.

482

## 483 **Acknowledgements**



484 Author Contributions

485 Conception and design: ZCJ, ZJZ, CL, WHW, JLM, and CYC; Analysis and  
486 interpretation of data: ZJZ, CL, JLM, YPZ, DL, TYL, JHL, SJZ, JSM, RNL, and LW;  
487 Drafting of the manuscript: ZJZ and CL; Critical revision of the manuscript for  
488 important intellectual content: ZCJ, JLM, DL, and YPZ; Final approval of the  
489 manuscript: all authors; Statistical expertise: KS; Obtaining research funding: ZCJ  
490 and ZJZ; Acquisition of data: LC, ZJZ, JHL, WHW, CYC, and DL.

491

492 **Sources of funding**

493 This work was supported by grants from the National Key Research and Development  
494 Program of China (2022YFC2703902 and 2022YFC2703901), the CAMS Innovation  
495 Fund for Medical Sciences (2021-I2M-1-018), National Natural Science Foundation  
496 of China (82241020 and 32371506), Natural Science Foundation of Shanghai  
497 (22ZR1452400), Pujiang Talent Program (22PJD064), and National High-Level  
498 Hospital Clinical Research Funding (2022-PUMCH-B-099 and 2022-PUMCH-A-  
499 200).

500

501 **Disclosures**

502 None

503

504 **Supplemental materials**

505 Supplemental methods

506 Supplemental Figure S1

507

508 **References**

- 509 1. Galie N, Humbert M, Vachiery JL, Gibbs S, Lang I, Torbicki A, Simonneau G,  
510 Peacock A, Vonk Noordegraaf A, Beghetti M, et al. 2015 ESC/ERS Guidelines  
511 for the diagnosis and treatment of pulmonary hypertension: The Joint Task  
512 Force for the Diagnosis and Treatment of Pulmonary Hypertension of the  
513 European Society of Cardiology (ESC) and the European Respiratory Society  
514 (ERS): Endorsed by: Association for European Paediatric and Congenital  
515 Cardiology (AEPC), International Society for Heart and Lung Transplantation  
516 (ISHLT). *Eur Heart J*. 2016;37:67-119. doi: 10.1093/eurheartj/ehv317
- 517 2. Galie N, Humbert M, Vachiery JL, Gibbs S, Lang I, Torbicki A, Simonneau G,  
518 Peacock A, Vonk Noordegraaf A, Beghetti M, et al. 2015 ESC/ERS Guidelines  
519 for the diagnosis and treatment of pulmonary hypertension: The Joint Task  
520 Force for the Diagnosis and Treatment of Pulmonary Hypertension of the  
521 European Society of Cardiology (ESC) and the European Respiratory Society  
522 (ERS): Endorsed by: Association for European Paediatric and Congenital  
523 Cardiology (AEPC), International Society for Heart and Lung Transplantation  
524 (ISHLT). *Eur Respir J*. 2015;46:903-975. doi: 10.1183/13993003.01032-2015
- 525 3. Humbert M, Sitbon O, Chaouat A, Bertocchi M, Habib G, Gressin V, Yaici A,  
526 Weitzenblum E, Cordier JF, Chabot F, et al. Survival in patients with  
527 idiopathic, familial, and anorexigen-associated pulmonary arterial

- 528 hypertension in the modern management era. *Circulation*. 2010;122:156-163.  
529 doi: 10.1161/CIRCULATIONAHA.109.911818
- 530 4. Farber HW, Miller DP, Poms AD, Badesch DB, Frost AE, Muros-Le Rouzic E,  
531 Romero AJ, Benton WW, Elliott CG, McGoon MD, et al. Five-Year outcomes  
532 of patients enrolled in the REVEAL Registry. *Chest*. 2015;148:1043-1054.  
533 doi: 10.1378/chest.15-0300
- 534 5. Benza RL, Miller DP, Barst RJ, Badesch DB, Frost AE, McGoon MD. An  
535 evaluation of long-term survival from time of diagnosis in pulmonary arterial  
536 hypertension from the REVEAL Registry. *Chest*. 2012;142:448-456. doi:  
537 10.1378/chest.11-1460
- 538 6. Pan HM, McClelland RL, Moutchia J, Appleby DH, Fritz JS, Holmes JH,  
539 Minhas J, Palevsky HI, Urbanowicz RJ, Kawut SM, et al. Heterogeneity of  
540 treatment effects by risk in pulmonary arterial hypertension. *Eur Respir J*.  
541 2023;62. doi: 10.1183/13993003.00190-2023
- 542 7. Evans CE, Cober ND, Dai Z, Stewart DJ, Zhao YY. Endothelial cells in the  
543 pathogenesis of pulmonary arterial hypertension. *Eur Respir J*. 2021;58. doi:  
544 10.1183/13993003.03957-2020
- 545 8. Thenappan T, Ormiston ML, Ryan JJ, Archer SL. Pulmonary arterial  
546 hypertension: pathogenesis and clinical management. *BMJ*. 2018;360:j5492.  
547 doi: 10.1136/bmj.j5492
- 548 9. Ferrian SP, Cao A, McCaffrey EF, Saito T, Greenwald NF, Nicolls MR, Bruce  
549 T, Zamanian RT, Del Rosario P, Rabinovitch M, et al. Single-Cell Imaging

- 550 Maps Inflammatory Cell Subsets to Pulmonary Arterial Hypertension  
551 Vasculopathy. *Am J Respir Crit Care Med*. 2023. doi: 10.1164/rccm.202209-  
552 1761OC
- 553 10. Hart GW, Copeland RJ. Glycomics hits the big time. *Cell*. 2010;143:672-676.  
554 doi: 10.1016/j.cell.2010.11.008
- 555 11. Ohtsubo K, Marth JD. Glycosylation in cellular mechanisms of health and  
556 disease. *Cell*. 2006;126:855-867. doi: 10.1016/j.cell.2006.08.019
- 557 12. Memarian E, Heijmans R, Slieker RC, Sierra A, Gornik O, Beulens JWJ,  
558 Hanic M, Elders P, Pascual J, Sijbrands E, et al. IgG N-glycans are associated  
559 with prevalent and incident complications of type 2 diabetes. *Diabetes Metab*  
560 *Res Rev*. 2023;39:e3685. doi: 10.1002/dmrr.3685
- 561 13. Varki A. Biological roles of oligosaccharides: all of the theories are correct.  
562 *Glycobiology*. 1993;3:97-130. doi: 10.1093/glycob/3.2.97
- 563 14. Schwab I, Nimmerjahn F. Intravenous immunoglobulin therapy: how does IgG  
564 modulate the immune system? *Nat Rev Immunol*. 2013;13:176-189. doi:  
565 10.1038/nri3401
- 566 15. Arnold JN, Wormald MR, Sim RB, Rudd PM, Dwek RA. The impact of  
567 glycosylation on the biological function and structure of human  
568 immunoglobulins. *Annu Rev Immunol*. 2007;25:21-50. doi:  
569 10.1146/annurev.immunol.25.022106.141702
- 570 16. Simurina M, de Haan N, Vuckovic F, Kennedy NA, Stambuk J, Falck D,  
571 Trbojevic-Akmacic I, Clerc F, Razdorov G, Khon A, et al. Glycosylation of

- 572 Immunoglobulin G Associates With Clinical Features of Inflammatory Bowel  
573 Diseases. *Gastroenterology*. 2018;154:1320-1333 e1310. doi:  
574 10.1053/j.gastro.2018.01.002
- 575 17. Jefferis R. Glycosylation as a strategy to improve antibody-based therapeutics.  
576 *Nat Rev Drug Discov*. 2009;8:226-234. doi: 10.1038/nrd2804
- 577 18. Pucic M, Knezevic A, Vidic J, Adamczyk B, Novokmet M, Polasek O, Gornik  
578 O, Supraha-Goreta S, Wormald MR, Redzic I, et al. High throughput isolation  
579 and glycosylation analysis of IgG-variability and heritability of the IgG  
580 glycome in three isolated human populations. *Mol Cell Proteomics*.  
581 2011;10:M111 010090. doi: 10.1074/mcp.M111.010090
- 582 19. Scanlan CN, Burton DR, Dwek RA. Making autoantibodies safe. *Proc Natl*  
583 *Acad Sci U S A*. 2008;105:4081-4082. doi: 10.1073/pnas.0801192105
- 584 20. Freidin MB, Keser T, Gudelj I, Stambuk J, Vucenovic D, Allegri M, Pavic T,  
585 Simurina M, Fabiane SM, Lauc G, et al. The Association Between Low Back  
586 Pain and Composition of IgG Glycome. *Sci Rep*. 2016;6:26815. doi:  
587 10.1038/srep26815
- 588 21. Davies J, Jiang L, Pan LZ, LaBarre MJ, Anderson D, Reff M. Expression of  
589 GnTIII in a recombinant anti-CD20 CHO production cell line: Expression of  
590 antibodies with altered glycoforms leads to an increase in ADCC through  
591 higher affinity for FC gamma RIII. *Biotechnol Bioeng*. 2001;74:288-294.
- 592 22. Mihai S, Nimmerjahn F. The role of Fc receptors and complement in  
593 autoimmunity. *Autoimmun Rev*. 2013;12:657-660. doi:

- 594 10.1016/j.autrev.2012.10.008
- 595 23. Karsten CM, Pandey MK, Figge J, Kilchenstein R, Taylor PR, Rosas M,  
596 McDonald JU, Orr SJ, Berger M, Petzold D, et al. Anti-inflammatory activity  
597 of IgG1 mediated by Fc galactosylation and association of FcγRIIB and  
598 dectin-1. *Nat Med.* 2012;18:1401-1406. doi: 10.1038/nm.2862
- 599 24. Zhang ZJ, Wang HF, Lian TY, Zhou YP, Xu XQ, Guo F, Wei YP, Li JY, Sun K,  
600 Liu C, et al. Human Plasma IgG N-Glycome Profiles Reveal a  
601 Proinflammatory Phenotype in Chronic Thromboembolic Pulmonary  
602 Hypertension. *Hypertension.* 2023;80:1929-1939. doi:  
603 10.1161/HYPERTENSIONAHA.123.21408
- 604 25. Ren S, Zhang Z, Xu C, Guo L, Lu R, Sun Y, Guo J, Qin R, Qin W, Gu J.  
605 Distribution of IgG galactosylation as a promising biomarker for cancer  
606 screening in multiple cancer types. *Cell Res.* 2016;26:963-966. doi:  
607 10.1038/cr.2016.83
- 608 26. Qian Y, Wang Y, Zhang X, Zhou L, Zhang Z, Xu J, Ruan Y, Ren S, Xu C, Gu  
609 J. Quantitative analysis of serum IgG galactosylation assists differential  
610 diagnosis of ovarian cancer. *J Proteome Res.* 2013;12:4046-4055. doi:  
611 10.1021/pr4003992
- 612 27. Zhang Z, Wu J, Liu P, Kang L, Xu X. Diagnostic Potential of Plasma IgG N-  
613 glycans in Discriminating Thyroid Cancer from Benign Thyroid Nodules and  
614 Healthy Controls. *Front Oncol.* 2021;11:658223. doi:  
615 10.3389/fonc.2021.658223

- 616 28. Reiding KR, Blank D, Kuijper DM, Deelder AM, Wuhrer M. High-throughput  
617 profiling of protein N-glycosylation by MALDI-TOF-MS employing linkage-  
618 specific sialic acid esterification. *Anal Chem.* 2014;86:5784-5793. doi:  
619 10.1021/ac500335t
- 620 29. Clerc F, Reiding KR, Jansen BC, Kammeijer GS, Bondt A, Wuhrer M. Human  
621 plasma protein N-glycosylation. *Glycoconj J.* 2016;33:309-343. doi:  
622 10.1007/s10719-015-9626-2
- 623 30. Kylhammar D, Kjellstrom B, Hjalmarsson C, Jansson K, Nisell M, Soderberg  
624 S, Wikstrom G, Radegran G. A comprehensive risk stratification at early  
625 follow-up determines prognosis in pulmonary arterial hypertension. *Eur Heart*  
626 *J.* 2018;39:4175-4181. doi: 10.1093/eurheartj/ehx257
- 627 31. Hoeper MM, Kramer T, Pan Z, Eichstaedt CA, Spiesshoefer J, Benjamin N,  
628 Olsson KM, Meyer K, Vizza CD, Vonk-Noordegraaf A, et al. Mortality in  
629 pulmonary arterial hypertension: prediction by the 2015 European pulmonary  
630 hypertension guidelines risk stratification model. *Eur Respir J.* 2017;50. doi:  
631 10.1183/13993003.00740-2017
- 632 32. Perkins NJ, Schisterman EF. The Youden Index and the optimal cut-point  
633 corrected for measurement error. *Biom J.* 2005;47:428-441. doi:  
634 10.1002/bimj.200410133
- 635 33. Boucly A, Weatherald J, Savale L, Jais X, Cottin V, Prevot G, Picard F, de  
636 Groote P, Jevnikar M, Bergot E, et al. Risk assessment, prognosis and  
637 guideline implementation in pulmonary arterial hypertension. *Eur Respir J.*

- 638 2017;50. doi: 10.1183/13993003.00889-2017
- 639 34. Kylhammar D, Hjalmarsson C, Hesselstrand R, Jansson K, Kavianipour M,  
640 Kjellstrom B, Nisell M, Soderberg S, Radegran G. Predicting mortality during  
641 long-term follow-up in pulmonary arterial hypertension. *ERJ Open Res.*  
642 2021;7. doi: 10.1183/23120541.00837-2020
- 643 35. Benza RL, Kanwar MK, Raina A, Scott JV, Zhao CL, Selej M, Elliott CG,  
644 Farber HW. Development and Validation of an Abridged Version of the  
645 REVEAL 2.0 Risk Score Calculator, REVEAL Lite 2, for Use in Patients With  
646 Pulmonary Arterial Hypertension. *Chest.* 2021;159:337-346. doi:  
647 10.1016/j.chest.2020.08.2069
- 648 36. Hoeper MM, Pausch C, Olsson KM, Huscher D, Pittrow D, Grunig E, Staehler  
649 G, Vizza CD, Gall H, Distler O, et al. COMPERA 2.0: a refined four-stratum  
650 risk assessment model for pulmonary arterial hypertension. *Eur Respir J.*  
651 2022;60. doi: 10.1183/13993003.02311-2021
- 652 37. Rhodes CJ, Wharton J, Ghataorhe P, Watson G, Girerd B, Howard LS, Gibbs  
653 JSR, Condliffe R, Elliot CA, Kiely DG, et al. Plasma proteome analysis in  
654 patients with pulmonary arterial hypertension: an observational cohort study.  
655 *Lancet Respir Med.* 2017;5:717-726. doi: 10.1016/S2213-2600(17)30161-3
- 656 38. Rhodes CJ, Wharton J, Swietlik EM, Harbaum L, Girerd B, Coghlan JG,  
657 Lordan J, Church C, Pepke-Zaba J, Toshner M, et al. Using the Plasma  
658 Proteome for Risk Stratifying Patients with Pulmonary Arterial Hypertension.  
659 *Am J Respir Crit Care Med.* 2022;205:1102-1111. doi: 10.1164/rccm.202105-



- 660 1118OC
- 661 39. Amsallem M, Sweatt AJ, Arthur Ataam J, Guihaire J, Lecerf F, Lambert M,  
662 Ghigna MR, Ali MK, Mao Y, Fadel E, et al. Targeted proteomics of right heart  
663 adaptation to pulmonary arterial hypertension. *Eur Respir J.* 2021;57. doi:  
664 10.1183/13993003.02428-2020
- 665 40. Humbert M, Kovacs G, Hoeper MM, Badagliacca R, Berger RMF, Brida M,  
666 Carlsen J, Coats AJS, Escribano-Subias P, Ferrari P, et al. 2022 ESC/ERS  
667 Guidelines for the diagnosis and treatment of pulmonary hypertension. *Eur*  
668 *Heart J.* 2022;43:3618-3731. doi: 10.1093/eurheartj/ehac237
- 669 41. Menni C, Gudelj I, Macdonald-Dunlop E, Mangino M, Zierer J, Besic E, Joshi  
670 PK, Trbojevic-Akmacic I, Chowienczyk PJ, Spector TD, et al. Glycosylation  
671 Profile of Immunoglobulin G Is Cross-Sectionally Associated With  
672 Cardiovascular Disease Risk Score and Subclinical Atherosclerosis in Two  
673 Independent Cohorts. *Circ Res.* 2018;122:1555-1564. doi:  
674 10.1161/CIRCRESAHA.117.312174
- 675 42. Gao Q, Dolikun M, Stambuk J, Wang H, Zhao F, Yiliham N, Wang Y,  
676 Trbojevic-Akmacic I, Zhang J, Fang H, et al. Immunoglobulin G N-Glycans as  
677 Potential Postgenomic Biomarkers for Hypertension in the Kazakh Population.  
678 *OMICS.* 2017;21:380-389. doi: 10.1089/omi.2017.0044
- 679 43. Cheron C, McBride SA, Antigny F, Girerd B, Chouchana M, Chaumais MC,  
680 Jais X, Bertoletti L, Sitbon O, Weatherald J, et al. Sex and gender in  
681 pulmonary arterial hypertension. *Eur Respir Rev.* 2021;30. doi:

- 682 10.1183/16000617.0330-2020
- 683 44. Boucly A, Savale L, Jais X, Bauer F, Bergot E, Bertoletti L, Beurnier A,  
684 Bourdin A, Bouvaist H, Bulifon S, et al. Association between Initial Treatment  
685 Strategy and Long-Term Survival in Pulmonary Arterial Hypertension. *Am J*  
686 *Respir Crit Care Med.* 2021;204:842-854. doi: 10.1164/rccm.202009-3698OC
- 687 45. Galie N, Channick RN, Frantz RP, Grunig E, Jing ZC, Moiseeva O, Preston  
688 IR, Pulido T, Safdar Z, Tamura Y, et al. Risk stratification and medical therapy  
689 of pulmonary arterial hypertension. *Eur Respir J.* 2019;53. doi:  
690 10.1183/13993003.01889-2018
- 691 46. Harbaum L, Fuge J, Kamp JC, Hennigs JK, Simon M, Sinning C, Oqueka T,  
692 Grimminger J, Olsson KM, Hoeper MM, et al. Blood carbon dioxide tension  
693 and risk in pulmonary arterial hypertension. *Int J Cardiol.* 2020;318:131-137.  
694 doi: 10.1016/j.ijcard.2020.06.069
- 695 47. Weatherald J, Boucly A, Chemla D, Savale L, Peng M, Jevnikar M, Jais X,  
696 Taniguchi Y, O'Connell C, Parent F, et al. Prognostic Value of Follow-Up  
697 Hemodynamic Variables After Initial Management in Pulmonary Arterial  
698 Hypertension. *Circulation.* 2018;137:693-704. doi:  
699 10.1161/CIRCULATIONAHA.117.029254
- 700 48. Yogeswaran A, Richter MJ, Sommer N, Ghofrani HA, Seeger W, Tello K, Gall  
701 H. Advanced risk stratification of intermediate risk group in pulmonary  
702 arterial hypertension. *Pulm Circ.* 2020;10:2045894020961739. doi:  
703 10.1177/2045894020961739

- 704 49. Liu S, Cheng L, Fu Y, Liu BF, Liu X. Characterization of IgG N-glycome  
705 profile in colorectal cancer progression by MALDI-TOF-MS. *J Proteomics*.  
706 2018;181:225-237. doi: 10.1016/j.jprot.2018.04.026
- 707 50. Pan H, Wu Z, Zhang H, Zhang J, Liu Y, Li Z, Feng W, Wang G, Liu Y, Zhao  
708 D, et al. Identification and validation of IgG N-glycosylation biomarkers of  
709 esophageal carcinoma. *Front Immunol*. 2023;14:981861. doi:  
710 10.3389/fimmu.2023.981861
- 711 51. Lu J, Chu J, Zou Z, Hamacher NB, Rixon MW, Sun PD. Structure of  
712 FcγRI in complex with Fc reveals the importance of glycan recognition  
713 for high-affinity IgG binding. *Proc Natl Acad Sci U S A*. 2015;112:833-838.  
714 doi: 10.1073/pnas.1418812112
- 715 52. Shields RL, Lai J, Keck R, O'Connell LY, Hong K, Meng YG, Weikert SH,  
716 Presta LG. Lack of fucose on human IgG1 N-linked oligosaccharide improves  
717 binding to human FcγRIII and antibody-dependent cellular toxicity. *J*  
718 *Biol Chem*. 2002;277:26733-26740. doi: 10.1074/jbc.M202069200
- 719 53. Goetze JP, Bruneau BG, Ramos HR, Ogawa T, de Bold MK, de Bold AJ.  
720 Cardiac natriuretic peptides. *Nat Rev Cardiol*. 2020;17:698-717. doi:  
721 10.1038/s41569-020-0381-0
- 722 54. Amez Martin M, Wuhler M, Falck D. Serum and Plasma Immunoglobulin G  
723 Fc N-Glycosylation Is Stable during Storage. *J Proteome Res*. 2021;20:2935-  
724 2941. doi: 10.1021/acs.jproteome.1c00148
- 725 55. Qin W, Pei H, Qin R, Zhao R, Han J, Zhang Z, Dong K, Ren S, Gu J.

726           Alteration of Serum IgG Galactosylation as a Potential Biomarker for

727           Diagnosis of Neuroblastoma. *J Cancer*. 2018;9:906-913. doi:

728           10.7150/jca.22014

729

730 **Table 1.** Baseline characteristics.

|                                        | <b>Discovery Cohort<br/>(n = 273)</b> | <b>Validation Cohort<br/>(n = 349)</b> |
|----------------------------------------|---------------------------------------|----------------------------------------|
| Recruitment period                     | 2013-2020                             | 2006-2013                              |
| Age, y                                 | 32.8 ± 10.4                           | 35.9 ± 16.8                            |
| Male, n (%)                            | 58 (21.2)                             | 109 (31.2)                             |
| Ethnic origin                          | Asian                                 | Asian                                  |
| IPAH/HPAH, n (%)                       | 259/14 (94.9/5.1)                     | 338/11 (96.8/3.2)                      |
| WHO FC, n (%)                          |                                       |                                        |
| I                                      | 7 (2.8)                               | 6 (1.8)                                |
| II                                     | 103 (41.2)                            | 107 (32.7)                             |
| III                                    | 124 (49.6)                            | 199 (60.9)                             |
| IV                                     | 16 (6.4)                              | 15 (4.6)                               |
| 6MWD, m                                | 416.8 ± 103.0                         | 377.4 ± 116.7                          |
| NT-proBNP, pg/mL                       | 941.0 (230.5–2,212.0)                 | 881.0 (289.0–1,944.0)                  |
| RAP, mm Hg                             | 8.4 ± 6.0                             | 8.0 ± 5.5                              |
| mPAP, mm Hg                            | 58.8 ± 15.6                           | 61.4 ± 14.6                            |
| PAWP, mm Hg                            | 9.5 ± 2.9                             | 8.3 ± 3.3                              |
| PVR, Wood units                        | 13.2 ± 6.1                            | 15.4 ± 7.8                             |
| Cardiac index, L/min/kg/m <sup>2</sup> | 2.5 ± 0.7                             | 2.5 ± 0.9                              |
| Cardiac output, L/min                  | 4.2 ± 1.3                             | 4.0 ± 1.5                              |
| SvO <sub>2</sub> , %                   | 65.5 ± 9.1                            | 62.4 ± 10.8                            |
| Three-strata risk (I/II/III), n (%)    | 88/138/30 (33.1/55.6/11.3)            | 96/206/37 (28.5/60.5/11.0)             |
| Targeted therapy, n (%)                |                                       |                                        |
| Treatment naive                        | 11 (4.0)                              | 66 (18.9)                              |
| Monotherapy                            | 80 (29.3)                             | 227 (65.0)                             |
| Dual therapy                           | 148 (54.2)                            | 53 (15.2)                              |
| Triple therapy                         | 34 (12.5)                             | 3 (0.9)                                |

731 6MWD = 6-minute walking distance; HPAH = heritable pulmonary arterial

732 hypertension; IPAH = idiopathic pulmonary arterial hypertension; mPAP = mean  
733 pulmonary artery pressure; NT-proBNP = N-terminal pro-B-type natriuretic peptide;  
734 PAWP = pulmonary artery wedge pressure; PVR = pulmonary vascular resistance;  
735 RAP= right atrial pressure; SvO<sub>2</sub> = mixed venous oxygen saturation; WHO FC = World  
736 Health Organization functional class.

737 **Table 2.** Results of Cox proportional hazards models examining the relationship between plasma IgG Fucosylation and risk of all-cause death in  
 738 overall analysis and subgroup analyses according to sex and therapeutic strategies.

|                                           | Unadjusted          |                | Fully-adjusted      |                | <i>P</i> for interaction |
|-------------------------------------------|---------------------|----------------|---------------------|----------------|--------------------------|
|                                           | HR (95%CI)          | <i>P</i> value | HR (95%CI)          | <i>P</i> value |                          |
| Total (n = 581)                           | 0.451 (0.292-0.696) | <0.001         | 0.490 (0.315-0.763) | 0.002          |                          |
| Sex                                       |                     |                |                     |                | 0.748                    |
| Male (n = 155)                            | 0.332 (0.154-0.715) | 0.005          | 0.387 (0.159-0.941) | 0.035          |                          |
| Female (n = 426)                          | 0.510 (0.301-0.863) | 0.012          | 0.527 (0.307-0.906) | 0.014          |                          |
| Therapy                                   |                     |                |                     |                | 0.410                    |
| Treatment naïve and monotherapy (n = 373) | 0.503 (0.304-0.834) | 0.008          | 0.570 (0.340-0.953) | 0.032          |                          |
| Dual and triple therapy (n = 208)         | 0.340 (0.144-0.805) | 0.014          | 0.376 (0.148-0.954) | 0.043          |                          |

739 The factors in the fully-adjusted models included age, sex, WHO-FC, 6MWD, NT-proBNP, RAP, SvO<sub>2</sub>, PVR, cardiac index, type of PAH, and  
 740 therapeutic strategies. The factors in the fully-adjusted models included age, sex, WHO-FC, 6MWD, NT-proBNP, RAP, SvO<sub>2</sub>, PVR, cardiac  
 741 index, type of PAH, and therapeutic strategies. 6MWD = 6-minute walking distance; NT-proBNP = N-terminal pro-B-type natriuretic peptide;  
 742 PAH = pulmonary arterial hypertension. PVR = pulmonary vascular resistance; RAP = right atrial pressure; SvO<sub>2</sub> = mixed venous oxygen  
 743 saturation; WHO FC = World Health Organization functional class.

744 **Figures**

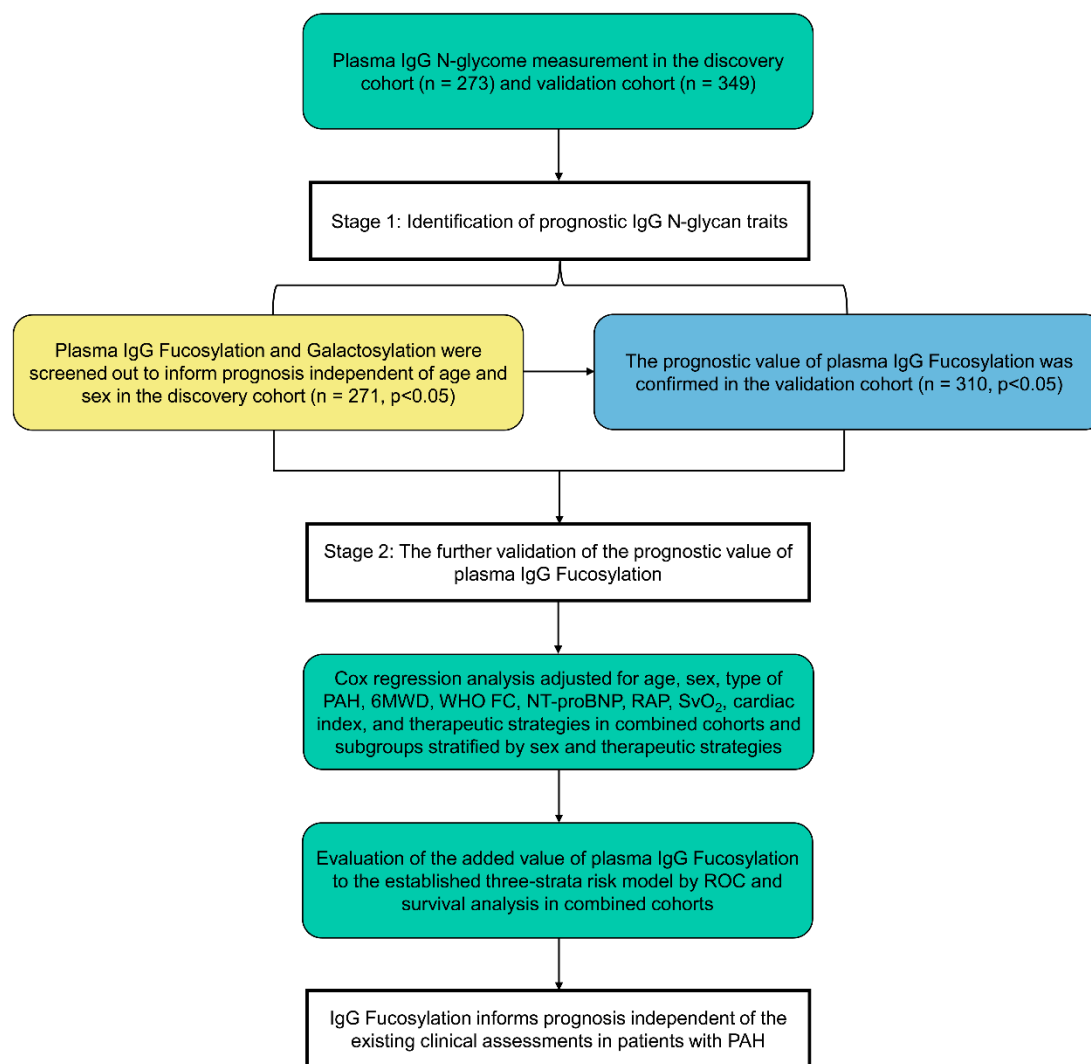

745

746 **Figure1.** Study design. 6MWD = 6-minute walking distance; NT-proBNP = N-  
747 terminal pro-B-type natriuretic peptide; PAH = pulmonary arterial hypertension. PVR  
748 = pulmonary vascular resistance; RAP = right atrial pressure; ROC = receiver-  
749 operating characteristic; SvO<sub>2</sub> = mixed venous oxygen saturation; WHO FC = World  
750 Health Organization functional class.



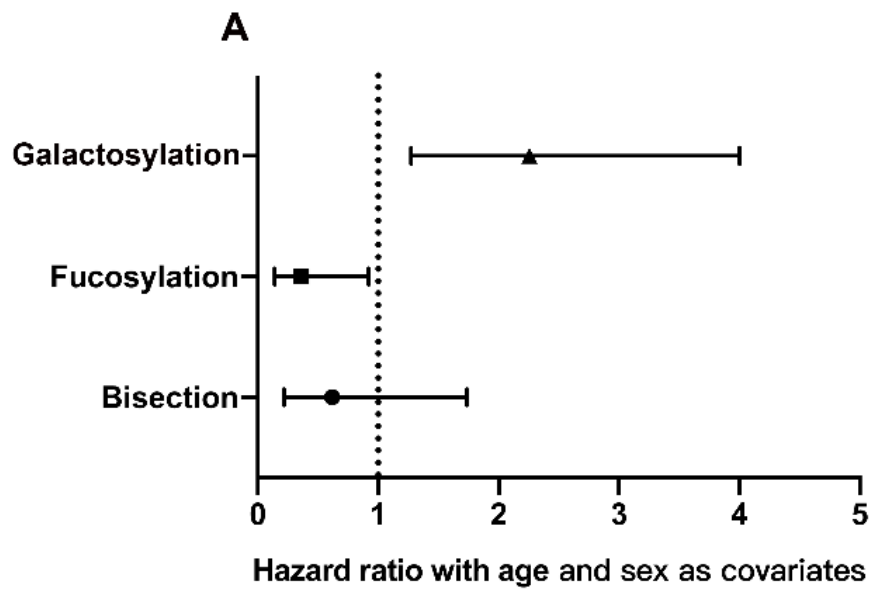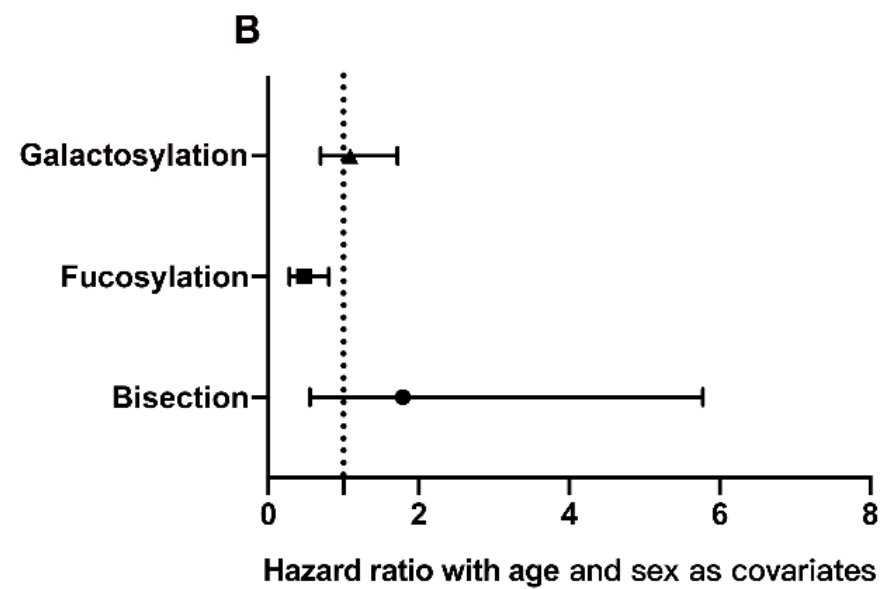

751

752 **Figure 2.** Hazard ratios and 95% CI from Cox regression analysis evaluating the prognostic IgG N-glycan traits in the discovery and validation

753 cohorts.

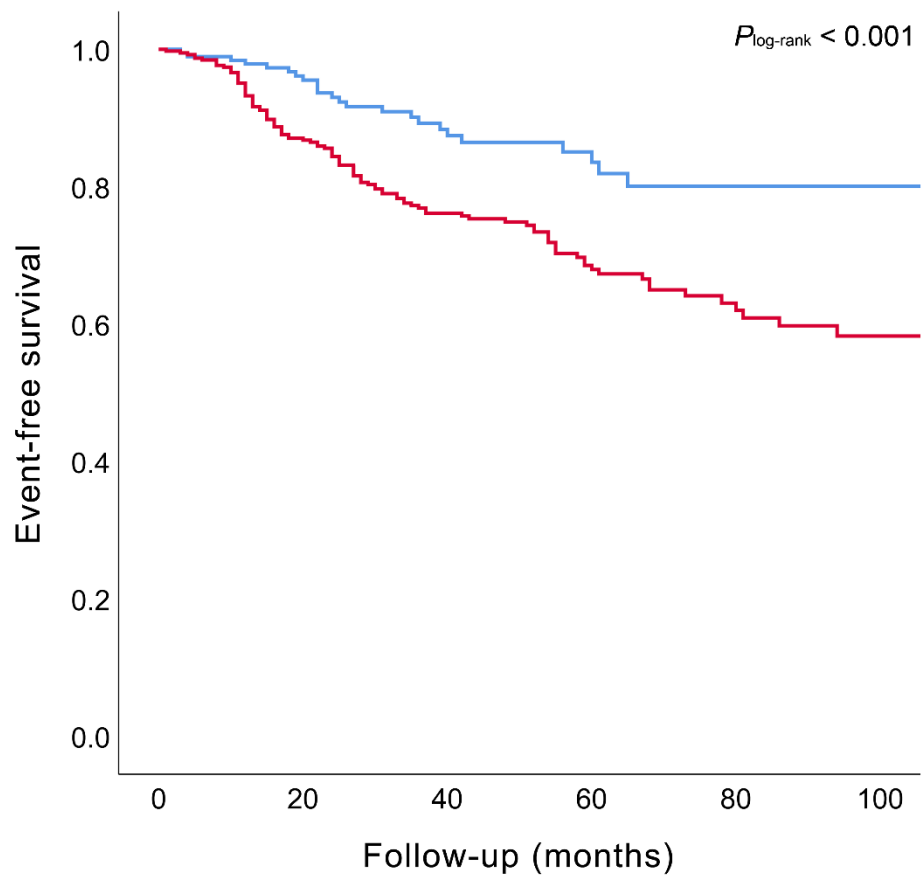

**Patients at risk (n)**

|                 |     |     |     |     |    |    |
|-----------------|-----|-----|-----|-----|----|----|
| <b>High Fuc</b> | 191 | 157 | 96  | 56  | 31 | 17 |
| <b>Low Fuc</b>  | 390 | 309 | 194 | 114 | 59 | 35 |

754

755 **Figure 3.** Kaplan-Meier survival curve for all-cause death stratified by IgG

756 Fucosylation in patients with pulmonary artery hypertension. “High Fuc” or “Low

757 Fuc” represents IgG Fucosylation higher or lower than 0.9741.

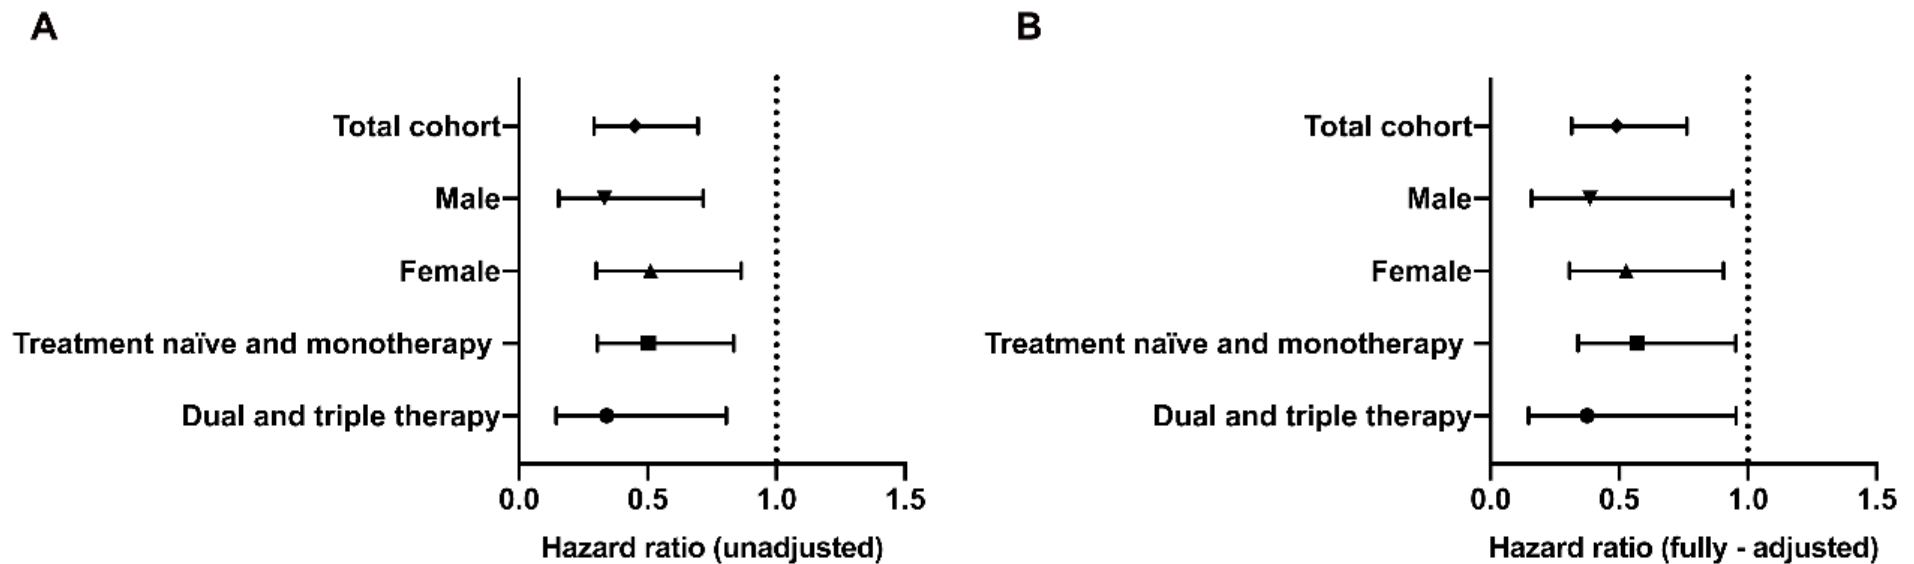

758

759 **Figure 4.** Hazard ratios and 95% CI from Cox regression analysis evaluating the IgG Fucosylation in combined cohorts and subgroup analyses

760 (A) without adjustment, and (B) with full adjustment. The factors in the fully-adjusted models included age, sex, WHO-FC, 6MWD, NT-

761 proBNP, RAP, SvO<sub>2</sub>, PVR, cardiac index, type of PAH, and therapeutic strategies. 6MWD = 6-minute walking distance; NT-proBNP = N-

762 terminal pro-B-type natriuretic peptide; PAH = pulmonary arterial hypertension. PVR = pulmonary vascular resistance; RAP = right atrial

763 pressure; SvO<sub>2</sub> = mixed venous oxygen saturation; WHO FC = World Health Organization functional class.

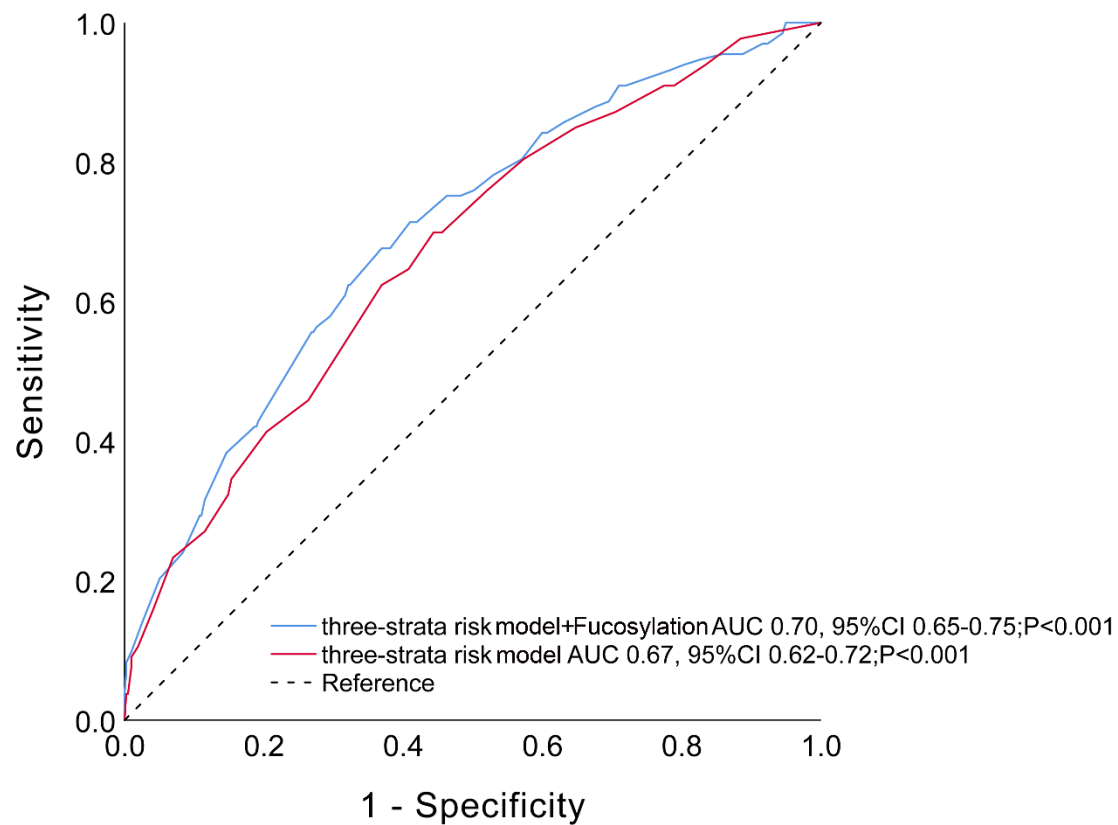

764

1 - Specificity

765 **Figure 5.** The performance of the established three-strata model (from the SPAHR

766 and COMPERA analyses) before and after the addition of IgG Fucosylation evaluated

767 by receiver-operating characteristic analysis. AUC = area under the curve.

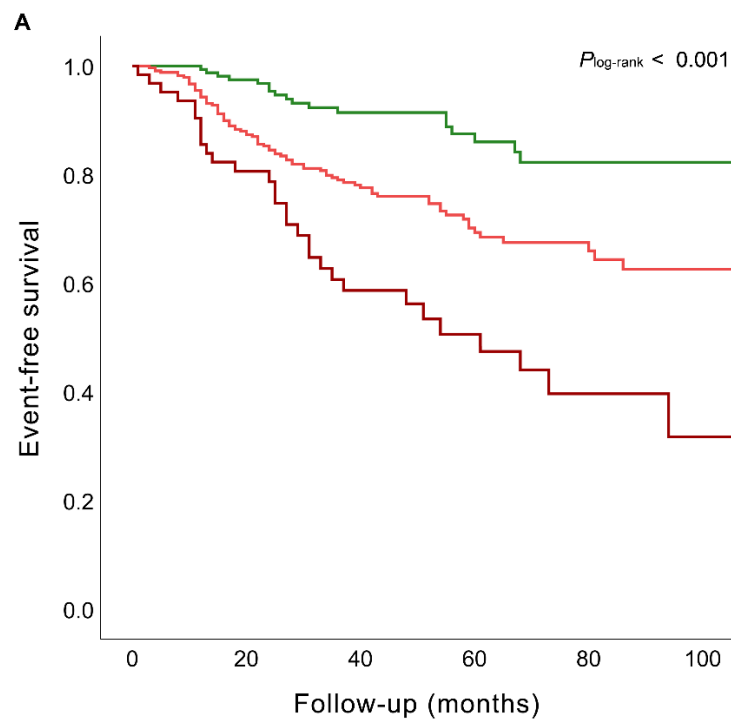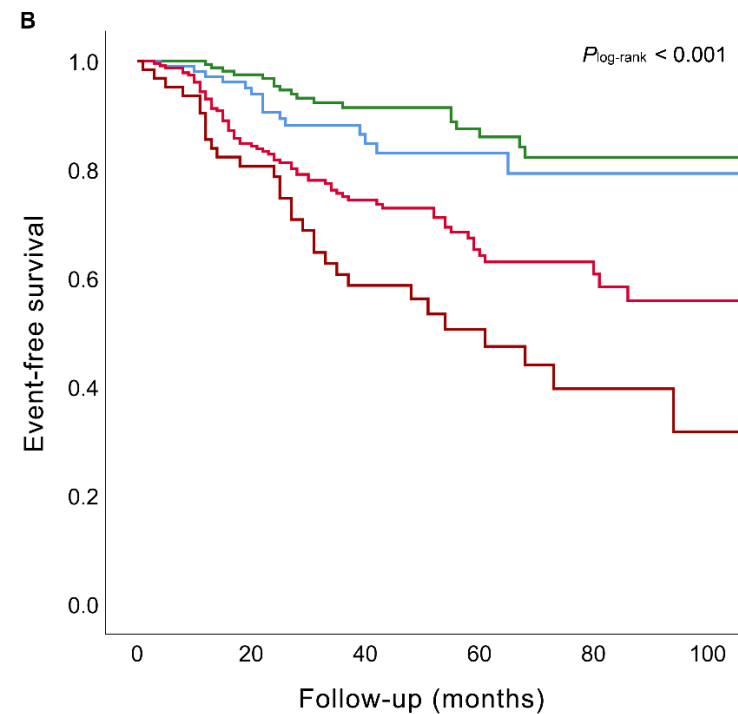

| Patients at risk (n) |     |     |     |    |    |    |
|----------------------|-----|-----|-----|----|----|----|
| Low risk             | 170 | 146 | 92  | 59 | 35 | 24 |
| Intermediate         | 336 | 263 | 159 | 86 | 45 | 24 |
| High risk            | 63  | 46  | 29  | 18 | 7  | 2  |

| Patients at risk (n)   |     |     |     |    |    |    |
|------------------------|-----|-----|-----|----|----|----|
| Low risk               | 170 | 146 | 92  | 59 | 35 | 24 |
| Intermediate-low risk  | 105 | 86  | 51  | 26 | 17 | 8  |
| Intermediate-high risk | 231 | 177 | 108 | 60 | 28 | 16 |
| High risk              | 63  | 46  | 29  | 18 | 7  | 2  |

768

769 **Figure 6.** Kaplan-Meier survival curve for all-cause death stratified by the established three-strata model (from the SPAHR and COMPERA

770 analyses) (A) before and (B) after the addition of IgG Fucosylation in patients with pulmonary artery hypertension.
